# Supplementary material for: Production of reproductively sterile fish by a non-transgenic gene silencing technology
Source: PubMed Central journal article supplement (PMC4625178; doi:10.1038/srep15822), 2015-10-29
Supplement: srep15822-s1.pdf [file srep15822-s1.pdf]

1 **Supplementary information**

2

3 **Title:** Production of reproductively sterile fish by a non-transgenic gene silencing technology

4

5 **Authors and Authors' affiliation:**

6 Ten-Tsao Wong and Yonathan Zohar

7 Department of Marine Biotechnology & Institute of Marine and Environmental Technology

8 University of Maryland Baltimore County

9 701 E. Pratt Street

10 Baltimore, Maryland 21202, USA

1 **Supplementary Tables S1-8.** Results of *dnd*-MO-Vivo, *dnd*-MO or control MO-Vivo bath immersion using *in vitro*  
 2 fertilized *Tg (kop:DsRed-nanos3)* transgenic zebrafish embryos.

3

**Table S1. 24 hr immersion**

50 embryos per group in triplicates, 89% fertilization rate

A: *dnd*-MO-Vivo 20  $\mu$ M for 3 hrs, 10  $\mu$ M for 1 hr and 5  $\mu$ M for 20 hrs

B: *dnd*-MO-Vivo 10  $\mu$ M for 4 hrs and 5  $\mu$ M for 20 hrs

C: Water-only solution as control

|                             | A1  | A2  | A3  | B1  | B2  | B3  | C1  | C2  | C3  |
|-----------------------------|-----|-----|-----|-----|-----|-----|-----|-----|-----|
| embryos hatched (2dpf)      | 37  | 41  | 38  | 43  | 40  | 37  | 41  | 43  | 39  |
| and hatching rate           | 83% | 92% | 85% | 96% | 89% | 83% | 92% | 96% | 87% |
| adult fish obtained         | 30  | 27  | 33  | 37  | 32  | 27  | 33  | 39  | 31  |
| number of males             | 5   | 7   | 3   | 19  | 9   | 10  | 13  | 14  | 10  |
| number of females           | 16  | 10  | 12  | 11  | 15  | 13  | 20  | 25  | 21  |
| number of infertile fish    | 9   | 10  | 18  | 7   | 8   | 4   | 0   | 0   | 0   |
| % of infertile fish         | 30% | 27% | 55% | 19% | 25% | 15% | 0%  | 0%  | 0%  |
| Average % of infertile fish |     | 37% |     |     | 20% |     |     | 0%  |     |

4

**Table S2. 24 hr immersion**

60 eggs per group in duplicates, 91% fertilization rate

A: *dnd*-MO-Vivo 60  $\mu$ M for 0.5 hr, 40  $\mu$ M for 2 hrs, 20  $\mu$ M for 3 hrs, 10  $\mu$ M for 6.5 hrs and 5  $\mu$ M for 12 hrs

B: *dnd*-MO-Vivo 40  $\mu$ M for 3 hrs, 20  $\mu$ M for 2.5 hrs, 10  $\mu$ M for 6.5 hrs and 5  $\mu$ M for 12 hrs

C: *dnd*-MO 60  $\mu$ M for 0.5 hr, 40  $\mu$ M for 2 hrs, 20  $\mu$ M for 3 hrs, 10  $\mu$ M for 6.5 hrs and 5  $\mu$ M for 12 hrs

D: Control MO-Vivo 60  $\mu$ M for 0.5 hr, 40  $\mu$ M for 2 hrs, 20  $\mu$ M for 3 hrs, 10  $\mu$ M for 6.5 hrs and 5  $\mu$ M for 12 hrs

E: Water-only solution as control

|                             | A1   | A2   | B1   | B2   | C1  | C2  | D1  | D2  | E1  | E2  |
|-----------------------------|------|------|------|------|-----|-----|-----|-----|-----|-----|
| embryos hatched (2 dpf)     | 43   | 45   | 42   | 45   | 51  | 53  | 37  | 45  | 53  | 51  |
| and hatching rate           | 78%  | 82%  | 76%  | 82%  | 93% | 97% | 67% | 82% | 97% | 93% |
| adult fish obtained         | 27   | 29   | 26   | 31   | 38  | 32  | 29  | 26  | 40  | 34  |
| number of males             | 0    | 0    | 0    | 0    | 16  | 19  | 10  | 19  | 27  | 20  |
| number of females           | 0    | 0    | 0    | 0    | 22  | 13  | 19  | 7   | 13  | 14  |
| number of infertile fish    | 27   | 29   | 26   | 31   | 0   | 0   | 0   | 0   | 0   | 0   |
| % of infertile fish         | 100% | 100% | 100% | 100% | 0%  | 0%  | 0%  | 0%  | 0%  | 0%  |
| Average % of infertile fish |      | 100% |      | 100% |     | 0%  |     | 0%  |     | 0%  |

**Table S3. 24 hr immersion**

1

80 embryos per group in duplicates, 92% fertilization rate

A: *dnd*-MO-Vivo 40  $\mu$ M for 3 hrs, 20  $\mu$ M for 2.5 hrs, 10  $\mu$ M for 6.5 hrs and 5  $\mu$ M for 12 hrs

B: *dnd*-MO-Vivo 20  $\mu$ M for 5.5 hrs, 10  $\mu$ M for 6.5 hrs and 5  $\mu$ M for 12 hrs

C: *dnd*-MO-Vivo 20  $\mu$ M for 6 hrs, 10  $\mu$ M for 6 hrs and 5  $\mu$ M for 12 hrs

D: Water-only solution as control

|                             | A1   | A2   | B1  | B2  | C1  | C2  | D1  | D2  |
|-----------------------------|------|------|-----|-----|-----|-----|-----|-----|
| embryos hatched (2dpf)      | 57   | 54   | 66  | 62  | 63  | 56  | 71  | 68  |
| and hatching rate           | 77%  | 73%  | 89% | 84% | 85% | 76% | 96% | 92% |
| adult fish obtained         | 37   | 32   | 40  | 45  | 36  | 44  | 48  | 54  |
| number of males             | 0    | 0    | 11  | 17  | 10  | 11  | 23  | 21  |
| number of females           | 0    | 0    | 6   | 7   | 4   | 4   | 25  | 33  |
| number of infertile fish    | 37   | 32   | 23  | 21  | 22  | 29  | 0   | 0   |
| % of infertile fish         | 100% | 100% | 58% | 47% | 59% | 66% | 0%  | 0%  |
| Average % of infertile fish |      | 100% |     | 53% |     | 63% |     | 0%  |

**Table S4. 24 hr immersion**

1

60 embryos per group in duplicates, 94% fertilization rate.

A: *dnd*-MO-Vivo 60  $\mu$ M for 0.5 hr, 40  $\mu$ M for 2 hrs, 20  $\mu$ M for 3 hrs, 10  $\mu$ M for 4.5 hrs and 5  $\mu$ M for 14 hrs

B: *dnd*-MO-Vivo 60  $\mu$ M for 1 hr, 40  $\mu$ M for 1.5 hrs, 20  $\mu$ M for 3 hrs, 10  $\mu$ M for 4.5 hrs and 5  $\mu$ M for 14 hrs

C: *dnd*-MO-Vivo 60  $\mu$ M for 1.5 hrs, 40  $\mu$ M for 1 hr, 20  $\mu$ M for 3 hrs, 10  $\mu$ M for 4.5 hrs and 5  $\mu$ M for 14 hrs

D: Water-only solution as control

E\*: *dnd*-MO-Vivo 60  $\mu$ M for 0.5 hr, 40  $\mu$ M for 2 hrs, 20  $\mu$ M for 3 hrs, 10  $\mu$ M for 4.5 hrs and 5  $\mu$ M for 14 hrs

|                             | A1   | A2   | B1   | B2   | C1   | C2   | D1  | D2  | E1  | E2  |
|-----------------------------|------|------|------|------|------|------|-----|-----|-----|-----|
| embryos hatched (2dpf)      | 41   | 40   | 33   | 30   | 26   | 22   | 52  | 50  | 45  | 47  |
| and hatching rate           | 72%  | 72%  | 58%  | 53%  | 46%  | 39%  | 92% | 88% | 84% | 83% |
| adult fish obtained         | 28   | 32   | 19   | 21   | 11   | 8    | 39  | 43  | 34  | 29  |
| number of males             | 0    | 0    | 0    | 0    | 0    | 0    | 16  | 15  | 12  | 9   |
| number of females           | 0    | 0    | 0    | 0    | 0    | 0    | 23  | 28  | 7   | 3   |
| number of infertile fish    | 28   | 32   | 19   | 21   | 11   | 8    | 0   | 0   | 15  | 17  |
| % of infertile fish         | 100% | 100% | 100% | 100% | 100% | 100% | 0%  | 0%  | 44% | 59% |
| Average % of infertile fish |      | 100% |      | 100% |      | 100% |     | 0%  |     | 52% |

\*Started the treatment at 1 hr post-fertilization.

**Table S5. 6 hr immersion**

1

60 embryos per group in triplicates, 93% fertilization rate

A: *dnd*-MO-Vivo 60  $\mu$ M for 1 hr, 40  $\mu$ M for 1.5 hrs and 20  $\mu$ M for 3.5 hrs

B: *dnd*-MO-Vivo 40  $\mu$ M for 3 hrs and 20  $\mu$ M for 3 hrs

C: *dnd*-MO-Vivo 20  $\mu$ M for 6 hrs

D: control MO-Vivo solution 60  $\mu$ M for 1 hr, 40  $\mu$ M for 1.5 hrs and 20  $\mu$ M for 3.5 hrs

|                             | A1   | A2   | A3   | B1   | B2   | B3   | C1  | C2  | C3  | D1  | D2  | D3  |
|-----------------------------|------|------|------|------|------|------|-----|-----|-----|-----|-----|-----|
| embryos hatched (2dpf)      | 35   | 42   | 34   | 45   | 47   | 40   | 52  | 43  | 48  | 32  | 40  | 37  |
| and hatching rate           | 62%  | 75%  | 60%  | 80%  | 84%  | 71%  | 93% | 77% | 86% | 57% | 71% | 66% |
| adult fish obtained         | 28   | 31   | 29   | 35   | 33   | 27   | 37  | 32  | 31  | 25  | 34  | 31  |
| number of males             | 0    | 0    | 0    | 0    | 0    | 0    | 14  | 11  | 13  | 17  | 16  | 10  |
| number of females           | 0    | 0    | 0    | 0    | 0    | 0    | 8   | 5   | 6   | 8   | 18  | 21  |
| number of infertile fish    | 28   | 31   | 29   | 35   | 33   | 27   | 15  | 16  | 12  | 0   | 0   | 0   |
| % of infertile fish         | 100% | 100% | 100% | 100% | 100% | 100% | 41% | 50% | 39% | 0%  | 0%  | 0%  |
| Average % of infertile fish |      | 100% |      |      | 100% |      |     | 43% |     |     | 0%  |     |

**Table S6. 5 hr immersion**

60 embryos per group in duplicates, 82% fertilization rate

A: *dnd*-MO-Vivo 60  $\mu$ M for 1 hr, 40  $\mu$ M for 2 hrs, 20  $\mu$ M for 2 hrs

B: *dnd*-MO-Vivo 60  $\mu$ M for 1.5 hrs, 40  $\mu$ M for 1.5 hrs, 20  $\mu$ M for 2 hrs

C: *dnd*-MO-Vivo 60  $\mu$ M for 2 hrs, 40  $\mu$ M for 1 hr, 20  $\mu$ M for 2 hrs

D: Water-only solution as control

|                             | A1   | A2   | B1   | B2   | C1   | C2   | D1  | D2  |
|-----------------------------|------|------|------|------|------|------|-----|-----|
| embryos hatched (2 dpf)     | 33   | 35   | 21   | 17   | 14   | 13   | 49  | 45  |
| and hatching rate           | 67%  | 71%  | 42%  | 34%  | 28%  | 26%  | 99% | 91% |
| adult fish obtained         | 23   | 26   | 11   | 12   | 2    | 3    | 36  | 39  |
| number of males             | 0    | 0    | 0    | 0    | 0    | 0    | 16  | 22  |
| number of females           | 0    | 0    | 0    | 0    | 0    | 0    | 20  | 17  |
| number of infertile fish    | 23   | 26   | 11   | 12   | 2    | 3    | 0   | 0   |
| % of infertile fish         | 100% | 100% | 100% | 100% | 100% | 100% | 0%  | 0%  |
| Average % of infertile fish |      | 100% |      | 100% |      | 100% |     | 0%  |

**Table S7. 5 hr immersion**

60 embryos per group in duplicates, 86% fertilization rate

A: *dnd*-MO-Vivo 60  $\mu$ M for 1 hr, 40  $\mu$ M for 1.5 hrs and 20  $\mu$ M for 2.5 hrs

B: *dnd*-MO-Vivo 40  $\mu$ M for 3 hrs and 20  $\mu$ M for 2 hrs

C: *dnd*-MO-Vivo 20  $\mu$ M for 5 hrs

D: Water-only solution as control

|                             | A1   | A2   | B1   | B2   | C1  | C2  | D1  | D2  |
|-----------------------------|------|------|------|------|-----|-----|-----|-----|
| embryos hatched (2 dpf)     | 32   | 30   | 38   | 36   | 43  | 41  | 45  | 43  |
| and hatching rate           | 62%  | 58%  | 73%  | 69%  | 83% | 79% | 87% | 83% |
| adult fish obtained         | 26   | 23   | 32   | 29   | 35  | 33  | 37  | 33  |
| number of males             | 0    | 0    | 0    | 0    | 13  | 15  | 24  | 19  |
| number of females           | 0    | 0    | 0    | 0    | 7   | 8   | 13  | 14  |
| number of infertile fish    | 26   | 23   | 32   | 29   | 15  | 10  | 0   | 0   |
| % of infertile fish         | 100% | 100% | 100% | 100% | 43% | 30% | 0%  | 0%  |
| Average % of infertile fish |      | 100% |      | 100% |     | 37% |     | 0%  |



**Table S8. 5 hr immersion**

1

60 embryos per group in duplicates, 91% fertilization rate

A: *dnd*-MO-Vivo 60  $\mu$ M for 0.5 hr, 40  $\mu$ M for 2.5 hrs and 20  $\mu$ M for 2 hrs

B: *dnd*-MO-Vivo 20  $\mu$ M for 5 hrs

C: Water-only solution as control

|                             | A1   | A2   | B1  | B2  | C1  | C2  |
|-----------------------------|------|------|-----|-----|-----|-----|
| embryos hatched (2 dpf)     | 38   | 42   | 50  | 46  | 54  | 51  |
| and hatching rate           | 69%  | 76%  | 91% | 84% | 98% | 93% |
| adult fish obtained         | 31   | 34   | 36  | 39  | 40  | 38  |
| number of males             | 0    | 0    | 16  | 17  | 26  | 16  |
| number of females           | 0    | 0    | 7   | 5   | 14  | 22  |
| number of infertile fish    | 31   | 34   | 13  | 17  | 0   | 0   |
| % of infertile fish         | 100% | 100% | 36% | 43% | 0%  | 0%  |
| Average % of infertile fish |      | 100% |     | 40% |     | 0%  |
